# Supplementary material for: Dietary (Poly)phenols in Traumatic Brain Injury
Source: MDPI journal article supplement (doi:10.3390/ijms24108908), 2023-05-17
Supplement: s1 [file s1]

**Table S1.** Flavanols effects on TBI models after oral administration. TBI: traumatic brain injury; CCI: controlled cortical impact; WT: Wild-type; BBB: blood-brain barrier; ZO-1: zonula occludens 1; IL-1 $\beta$ : interleukin 1 beta; IL-6: interleukin 6; iNOS: inducible nitric oxide synthase; Nrf2: nuclear factor-erythroid factor 2-related factor; HO-1: heme oxygenase 1; ROS: reactive oxygen species; MMP9: matrix metalloproteinase; Keap1: Kelch-like ECH-associated protein 1; SOD1: superoxide dismutase; Iba-1: ionized calcium-binding adaptor molecule 1; GFAP: glial fibrillary acidic protein; TNF- $\alpha$ : tumor necrosis factor alpha; IKK: inhibitor of nuclear factor- $\kappa$ B (I $\kappa$ B) kinase; NF- $\kappa$ B: nuclear factor kappa B; MDA: malondialdehyde; Hpp: hippocampus; CAT: catalase; GSH: glutathione; AMPK: 5' AMP-activated protein kinase; 4-HNE; 8-OHdG: 8-hydroxy-2'-deoxyguanosine; d: day; h: hour.

| Flavanols                                                                                                                    | TBI model | Species                                                           | Route/<br>concentration                             | Regimen                                          | Time of<br>the brain<br>collection | Main results                                                                                                                                                                                                                                                                                                                                                                                                        | Reference |
|------------------------------------------------------------------------------------------------------------------------------|-----------|-------------------------------------------------------------------|-----------------------------------------------------|--------------------------------------------------|------------------------------------|---------------------------------------------------------------------------------------------------------------------------------------------------------------------------------------------------------------------------------------------------------------------------------------------------------------------------------------------------------------------------------------------------------------------|-----------|
| Catechin<br>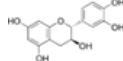                                | CCI       | Sprague-Dawley rats                                               | 1, 5, 10, 20 or 30 mg/kg body weight                | Once per day after TBI                           | 24 h after TBI                     | ↑neurological outcomes (motor and cognitive)<br>↓brain tissue damage<br>↓ brain edema<br>↑ BBB integrity<br>↑ Occludin and ZO-1 mRNA and protein levels<br>↓ IL-1 $\beta$ , IL-6, iNOS mRNA expression<br>↑ arginase-1 mRNA expression                                                                                                                                                                              | [83]      |
|                                                                                                                              |           |                                                                   | Short-term observation (3 days): 5, 15, or 45 mg/kg | 3 h after TBI and once daily for 3 days          | 1 and 3 days after TBI             | ↑ neurologic function (3 and 28d)<br>↑ cognitive performance (3 and 28d)<br>Improved depression-like behaviors (3 and 28d)<br>↓ brain edema (3d)                                                                                                                                                                                                                                                                    |           |
| (-)-epicatechin<br>                       | CCI       | C57BL/6 WT and Nrf2 KO mice                                       | Long-term observation (7 days): 15 mg/kg            | 3 h after TBI and once daily 7 days              | 28 days after TBI                  | ↓ lesion volume (3 and 28d)<br>↓ white matter injury (28d)<br>↓ neuronal cell death (3d)<br>↓ OH-1 expression (3d)<br>↓ferric iron deposition (3d)<br>↓neutrophil infiltration (1d)<br>↓ROS levels (3d)<br>↓activity of MMP9 (1d)<br>↓Keap 1 expression(3d)<br>↑Nrf2 nuclear accumulation (3d)<br>↑ SOD1 expression (3d)<br>↑quinone 1 expression (3d)                                                              | [84]      |
| (-)-Epigallocatechin-3-gallate (EGCG)<br> | CCI       | C57BL/6 mice (AMPK $\alpha$ 1flox/flox mice, and RosaCre-ER mice) | 0.2% (w/v) dissolved in drinking water              | Immediately after TBI and accessible till 7 days | 7 days after TBI                   | ↑ neurological score (including motor performance and spatial learning and memory)<br>↓ Iba-1 and GFAP mRNA levels in peri-injured area<br>↓ number of activated microglial and astroglial cells in peri-injured area<br>↓ TNF- $\alpha$ , IL-1 $\beta$ , IL-6 serum and brain protein levels in peri-injured area<br>↓ phosphorylation of IKK $\alpha$ / $\beta$ , I $\kappa$ B $\alpha$ and nuclear translocation | [85]      |

|     |             |                                        |                                                                                                                                                                                      |                           |                                                                                                                                                                                                                                                                                                                                                                                                                                                                                   |      |
|-----|-------------|----------------------------------------|--------------------------------------------------------------------------------------------------------------------------------------------------------------------------------------|---------------------------|-----------------------------------------------------------------------------------------------------------------------------------------------------------------------------------------------------------------------------------------------------------------------------------------------------------------------------------------------------------------------------------------------------------------------------------------------------------------------------------|------|
|     |             |                                        |                                                                                                                                                                                      |                           | of NF- $\kappa$ B p65 in peri-injured area<br>↓ O <sub>2</sub> , H <sub>2</sub> O <sub>2</sub> and MDA levels in the Hpp<br>↑ SOD, CAT and GSH levels in the Hpp<br>↑ AMPK phosphorylation                                                                                                                                                                                                                                                                                        |      |
|     |             |                                        |                                                                                                                                                                                      |                           | ↑ Morris water maze performance (3,4 and 5d)<br>↓ number of apoptotic cells around damaged region (ssDNA-labelling) (1, 3 and 7d)<br>↓ DNA damage (8-OHdG labelling) (1, 3 and 7d)<br>↓ lipid peroxidation in neurons (4-HNE labelling) (1 and 3d)<br>↓ MDA levels (1 and 3d)<br>↑ NeuN positive cells around the injury (7d)<br>↓ glial scar (GFAP labelling) (7d)                                                                                                               | [71] |
|     |             |                                        | Ad libitum access 4 weeks before TBI                                                                                                                                                 | 1, 3 and 7 days after TBI |                                                                                                                                                                                                                                                                                                                                                                                                                                                                                   |      |
|     |             |                                        |                                                                                                                                                                                      |                           | ↑ number of neural stem cells around the damaged area (nestin-positive cells) (1,3 and 7d)<br>↓ MDA levels (1 and 3d)<br>↓ lipid peroxidation and oxidative damage (4-HNE labelling) (1 and 3d)<br>↓ DNA damage (8-OHdG labelling) (1,3 and 7d)<br>↓ neuronal cell apoptosis (ssDNA-labelling) (1,3 and 7d)                                                                                                                                                                       | [72] |
| CCI | Wistar rats | 0.1% (w/v) dissolved in drinking water | Ad libitum access to EGCG 4 weeks before TBI                                                                                                                                         | 1, 3 and 7 days after TBI |                                                                                                                                                                                                                                                                                                                                                                                                                                                                                   |      |
|     |             |                                        |                                                                                                                                                                                      |                           | ↑ Morris water maze performance (only in continuous treatment and post-treatment groups) (4 and 5d)<br>↓ MDA levels (1 and 3d)<br>↓ lipid peroxidation and oxidative damage (4-HNE labelling) (1 and 3d)<br>↓ DNA damage (8-OHdG labelling) (1,3 and 7d)<br>↓ neuronal cell apoptosis (ssDNA-labelling) (1,3 and 7d)<br>↑ number of Bcl-2 positive cells around the damaged area (1 and 3d)<br>↑ NeuN positive cells around the injury (7d)<br>↓ glial scar (GFAP labelling) (7d) | [73] |
|     |             |                                        | Tree protocols were used: i) 4 weeks before TBI (pre-treatment)<br>ii) 4 weeks before TBI and 1 week after TBI (continuous treatment)<br>iii) only 1 week after TBI (post-treatment) | 1, 3 and 7 days after TBI |                                                                                                                                                                                                                                                                                                                                                                                                                                                                                   |      |

**Table S2.** Flavanones effects on TBI models after oral and intraperitoneal administration. TBI: traumatic brain injury; IL-1 $\beta$ : interleukin 1 beta; TNF- $\alpha$  : tumor necrosis factor alpha; MDA: malondialdehyde; Hpp: hippocampus; BDNF: brain-derived neurotrophic factor; IL-6: interleukin 6; iNOS: inducible nitric oxide synthase; Nrf2: nuclear factor-erythroid factor 2-related factor; ER: endoplasmic reticulum; GRP78: Glucose-regulated protein; ATF4: activating transcription factor 4; p-eIF2 $\alpha$ : phosphorylated eukaryotic translation initiation factor 2 $\alpha$ ; d: day; h: hour; n.s.: not specified.

| Flavanones                                                                                        | TBI model   | Species   | Route/<br>concentration  | Regimen                                                                       | Time of the<br>brain collection       | Main results                                                                                                                                                                                                                                                                                                                                                                  | Reference |
|---------------------------------------------------------------------------------------------------|-------------|-----------|--------------------------|-------------------------------------------------------------------------------|---------------------------------------|-------------------------------------------------------------------------------------------------------------------------------------------------------------------------------------------------------------------------------------------------------------------------------------------------------------------------------------------------------------------------------|-----------|
| Hesperidin<br>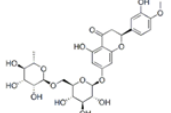   | Weight drop | NMRI mice | Oral gavage/<br>50 mg/kg | Once daily<br>starting 10<br>days after TBI<br>and lasting for<br>14 days     | Brain collection time (not specified) | ↓ TBI-induced depression-related symptoms<br>↓ IL-1 $\beta$ , TNF- $\alpha$ protein levels in Hpp<br>↓ MDA protein levels in Hpp<br>↑ BDNF protein levels in Hpp                                                                                                                                                                                                              | [88]      |
| Naringenin<br> | Weight drop | ICR mice  | IP/ 50 and<br>100 mg/kg  | Immediately<br>after TBI, and<br>then daily for 3<br>or 7 consecutive<br>days | 6h, 1, 3, 5 and 7<br>days after TBI   | ↓ neurological dysfunction (3, 5 and 7d)<br>↓ brain edema (3d)<br>↓ plasmalemma permeability (n.s.)<br>↓ neuronal cell loss (n.s.)<br>↑ Bcl-2 protein levels (n.s.)<br>↓ Bax and caspase-3 protein levels (n.s.)<br>↓ ER stress pathway (GRP78, ATF4, and CHOP) (n.s.)<br>↑ p-eIF2 $\alpha$<br>↓ MDA protein level (6h, 1, 3 and 5d)<br>↑ GPx protein level (6h, 1, 3 and 5d) | [87]      |

**Table S3.** Flavonols effects on TBI models after oral and intraperitoneal administration. TBI: traumatic brain injury; FPI: fluid percussion injury; IP: intraperitoneal injection; HPA: hypothalamic-pituitary-adrenal; TNF- $\alpha$  : tumor necrosis factor alpha; iNOS: inducible nitric oxide synthase; IL-1 $\beta$ : interleukin 1 beta; IL-6: interleukin 6; IL-10: interleukin 10; MDA: malondialdehyde; CAT: catalase; GPx: glutathione peroxidase; SOD: superoxide dismutase; Nrf2: nuclear factor-erythroid factor 2-related factor; HO-1: heme oxygenase 1; TBARS: thiobarbituric acid reactive substance; TUNEL: terminal deoxynucleotidyl transferase (TdT) dUTP Nick-End labeling; PGC-1 $\alpha$ : peroxisome proliferator-activated receptor-gamma coactivator-1 $\alpha$ ; ATP: adenosine triphosphate MPO: Myeloperoxidase; GSH: glutathione; ARE: antioxidant responsive element; BBB: blood-brain barrier; AChE: acetylcholinesterase; Hpp: hippocampus; d: day; h: hour.

| Flavonols                                                                                        | TBI model   | Species                               | Route/<br>concentration | Regimen                                                                    | Time of the<br>brain collection | Main results                                                                                                      | Reference |
|--------------------------------------------------------------------------------------------------|-------------|---------------------------------------|-------------------------|----------------------------------------------------------------------------|---------------------------------|-------------------------------------------------------------------------------------------------------------------|-----------|
| Quercetin<br>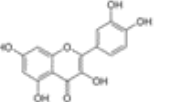 | Weight drop | Naval Medical Research Institute mice | Oral gavage/<br>50mg/kg | Once daily<br>starting 10<br>days after TBI<br>and lasting<br>next 14 days | 24 days after<br>TBI            | ↓ anxiety-like behaviours<br>↓ dysregulation of the HPA axis<br>↓ adrenocorticotrophic hormone and corticosterone | [102]     |

|             |                     |                          |                                       |                           |                                                                                                                                                                                                                                                                                                                                                  |       |
|-------------|---------------------|--------------------------|---------------------------------------|---------------------------|--------------------------------------------------------------------------------------------------------------------------------------------------------------------------------------------------------------------------------------------------------------------------------------------------------------------------------------------------|-------|
| Weight drop | Sprague Dawley rats | IP / 50 mg/kg            | 30 min, 12 and 24 h following the TBI | 1, 3 and 5 days after TBI | ↓ brain edema (1,3 and 5d)<br>↑ motor function (1,3 and 5d)<br>↓ neuronal apoptosis (1d)<br>↓ caspase-3 protein levels (1d)<br>↑ Akt serine/threonine protein kinase phosphorylation (1d)<br>↓ ERK ½ phosphorylation (1d)                                                                                                                        | [99]  |
| Weight drop | Sprague Dawley rats | IP / 50 mg/kg            | 30 min, 12 and 24 h following the TBI | 48h after TBI             | ↓ neurological impairment<br>↑ cognitive function<br>↓ neuronal autophagy<br>↑ p-Akt protein levels<br>↑ Bcl-2 protein levels                                                                                                                                                                                                                    | [100] |
| Weight-drop | Sprague Dawley rats | IP / 5, 20 or 50 mg/kg   | 0.5, 12 and 24 h post TBI             | 3 days after TBI          | ↓ brain edema<br>↓ microgliosis<br>↓ TNF- $\alpha$ , iNOS, IL-1 $\beta$ and IL-6 mRNA and protein levels in serum<br>↓ TNF- $\alpha$ , iNOS, IL-1 $\beta$ and IL-6 mRNA levels in the brain<br>Restored MDA, CAT, GPx and SOD levels in the brain<br>↑ nuclear and total Nrf2 levels in the brain<br>↑ HO-1 protein levels                       | [90]  |
| Weight-drop | Sprague–Dawley rats | IP/30 mg/kg              | 0, 24, 48, and 72 h after TBI         | 7 and 28 days after TBI   | ↓ cognitive deficits (25-28d)<br>↓ number of ED-1-positive cells (7 and 28d)<br>↓ number of TUNEL-positive cells (7d)<br>↓ Bax and cleaved-caspase-3 protein levels (7d)<br>↓ TNF- $\alpha$ , IL-1b and IL-6 protein levels (7d)<br>↑ IL-10 protein levels (7d)<br>↑ GPx, SOD, and CAT activity (7d)<br>↓ lipid peroxidation (TBARS levels) (7d) | [91]  |
| Weight-drop | ICR mice            | IP/ 20, 50 and 100 mg/kg | 30 min after TBI                      | 24h after TBI             | ↓ brain edema<br>↓ neuronal apoptosis<br>↓ Bax and cleaved-caspase-3 protein levels<br>↓ mitochondrial lesions                                                                                                                                                                                                                                   | [98]  |

|                                                                                     |                     |                     |                                                             |                        |                                                                                                   |      |
|-------------------------------------------------------------------------------------|---------------------|---------------------|-------------------------------------------------------------|------------------------|---------------------------------------------------------------------------------------------------|------|
|                                                                                     |                     |                     |                                                             |                        | ↑ PGC-1 $\alpha$ protein translocation to nucleus                                                 |      |
|                                                                                     |                     |                     |                                                             |                        | Restored cytochrome c, MDA and SOD levels in mitochondria                                         |      |
|                                                                                     |                     |                     |                                                             |                        | ↑ Nrf2 total protein levels                                                                       |      |
|                                                                                     |                     |                     |                                                             |                        | ↑ Nrf2 translocation to nucleus                                                                   |      |
|                                                                                     |                     |                     |                                                             |                        | Restored MDA levels, SOD activity, mitochondrial membrane potential and intracellular ATP content |      |
|                                                                                     |                     |                     |                                                             |                        | Restored levels of cytochrome c and Bax in cytosol and mitochondria                               |      |
| Weight-drop                                                                         | ICR mice            | IP/ 50 mg/kg        | 30 min after TBI                                            | 24h after TBI          |                                                                                                   | [94] |
|                                                                                     |                     |                     |                                                             |                        | ↑ action potential from corpus callosum (1 and 3d)                                                |      |
| FPI                                                                                 | Sprague-Dawley rats | IP/ 25 $\mu$ mol/kg | 1 h after injury with continued treatment at 12-h intervals | 1 and 3 days after TBI | ↓ Myeloperoxidase activity (1d)<br>↑ GSH levels protein levels (1d)                               | [95] |
|                                                                                     |                     |                     |                                                             |                        | ↑ neurological function (1 and 3d)                                                                |      |
|                                                                                     |                     |                     |                                                             |                        | ↓ cerebral edema (1d)                                                                             |      |
|                                                                                     |                     |                     |                                                             |                        | ↓ brain lesion volume (7d)                                                                        |      |
|                                                                                     |                     |                     |                                                             |                        | ↑ Nrf2 nuclear levels (1d)                                                                        |      |
|                                                                                     |                     |                     |                                                             |                        | ↑ Nrf2 binding to ARE (1d)                                                                        |      |
|                                                                                     |                     |                     |                                                             |                        | ↑ BBB integrity (1d)                                                                              |      |
|                                                                                     |                     |                     |                                                             |                        | ↓ neuroapoptosis (1d)                                                                             |      |
|                                                                                     |                     |                     |                                                             |                        | ↓cleaved Caspase-3 protein level (1d)                                                             |      |
|                                                                                     |                     |                     |                                                             |                        | ↑ Bcl-2 protein level (1d)                                                                        |      |
|                                                                                     |                     |                     |                                                             |                        | ↓ Bax protein level (1d)                                                                          |      |
|                                                                                     |                     |                     |                                                             |                        | Restored MDA and GPx levels (1d)                                                                  |      |
| Fisetin                                                                             |                     |                     |                                                             |                        |                                                                                                   |      |
| 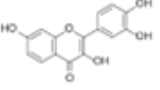 | Weight-drop         | ICR mice            | IP / 25, 50 and 75mg/kg (50mg/kg showed best effects)       | 30 min after TBI       | 1, 3 and 7 days after TBI                                                                         | [97] |
|                                                                                     |                     |                     |                                                             |                        | ↑ neurological function                                                                           |      |
|                                                                                     |                     |                     |                                                             |                        | ↓ brain edema                                                                                     |      |
|                                                                                     |                     |                     |                                                             |                        | ↓ neuronal apoptosis                                                                              |      |
|                                                                                     |                     |                     |                                                             |                        | ↓ cleaved-caspase-3 protein levels                                                                |      |
|                                                                                     |                     |                     |                                                             |                        | ↓ release of cytochrome c to cytoplasm                                                            |      |
|                                                                                     |                     |                     |                                                             |                        | ↓ translocation of Bax to mitochondria                                                            |      |
|                                                                                     |                     |                     |                                                             |                        | Restored levels of MDA and SOD                                                                    |      |
| Rutin                                                                               |                     |                     |                                                             |                        |                                                                                                   |      |
|  | Weight drop         | ICR mice            | IP/ 30, 50 and 80 mg/kg (50mg/kg showed best effects)       | 30 min after TBI       | 24h after TBI                                                                                     | [96] |

|             |             |                                   |                                                                |                           |                     |                                                                                                                                                              |
|-------------|-------------|-----------------------------------|----------------------------------------------------------------|---------------------------|---------------------|--------------------------------------------------------------------------------------------------------------------------------------------------------------|
| Weight drop | Wistar rats | Oral gavage/<br>50mg/kg           | Once a day for 3 days, starting right after the TBI            | 4 days after TBI          | [92]                | ↓ brain edema<br>↓ NF-κB and TNF-α protein levels<br>↓ neuronal degeneration<br>↓ poly-morpho-nuclear-leucocyte accumulation<br>Restored MDA and rGSH levels |
|             |             |                                   |                                                                |                           |                     | ↑ spatial memory<br>↓ AChE levels<br>↓ caspase-3 protein levels<br>↓ TNF-α protein levels                                                                    |
| Weight drop | Wistar rats | Oral gavage/ 20, 40, and 80 mg/kg | Once daily starting 14 days after TBI and lasting next 14 days | 28 days after TBI         | [93]                | ↑ neural connectivity in somatosensory cortex and Hpp<br>↑ neurovascular coupling                                                                            |
|             |             |                                   |                                                                |                           |                     | ↑ fractional anisotropy (FA)<br>↑ apparent diffusion coefficient<br>↑ corpus callosal fractional anisotropy<br>↑ parenchymal micro-structure                 |
| Kaempferol  | FPI         | Sprague–Dawley rats               | IP / 1 mg/kg                                                   | 1, 24, and 48 h after TBI | no brain harvesting | ↑ sensorimotor behavior                                                                                                                                      |
|             |             |                                   |                                                                |                           |                     | Altered metabolome of the brain                                                                                                                              |

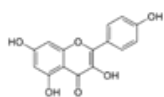

**Table S4.** Flavones effects on TBI models after oral and intraperitoneal administration. TBI: traumatic brain injury; CCI: controlled cortical impact; WT: Wild type; IP: intraperitoneal injection; SOD: superoxide dismutase; CAT: catalase; GPx: glutathione peroxidase; GSH: glutathione; MDA: malondialdehyde; IHC: immunohistochemistry; VCS: Veterinary Coma Scale; TNF-α : tumor necrosis factor alpha; IL-1β: interleukin 1 beta; Aβ: amyloid β; GSK-3: Glycogen synthase kinase-3; NF-κB: nuclear factor kappa B; BBB: blood-brain barrier; Nrf2: nuclear factor-erythroid factor 2-related factor; HO-1: heme oxygenase 1; NQO1: NAD(P)H:quinone oxidoreductase 1; d: day; h: hour.

| Flavones | TBI model   | Species     | Route/<br>concentration                                             | Regimen                                           | Time of the<br>brain collection | Main results                                                                                                                                                                                                                                                  | Reference |
|----------|-------------|-------------|---------------------------------------------------------------------|---------------------------------------------------|---------------------------------|---------------------------------------------------------------------------------------------------------------------------------------------------------------------------------------------------------------------------------------------------------------|-----------|
| Chrysin  | Weight-drop | Wistar rats | Oral gavage / 25, 50 or 100 mg/kg<br>(100mg/kg showed best effects) | Once a day for 3 or 14 days, starting right after | 3, 14 and 28 days after TBI     | ↑ motor coordination (3-14d)<br>↑ learning and memory (3-14d)<br>↑ SOD, CAT, GPx, and GSH protein levels (3 and 14d)<br>↓ MDA content (3 and 14d)<br>↓ neuroapoptosis (28d)<br>↑ Bcl-2 protein expression (IHC) (28d)<br>↓ Bax protein expression (IHC) (28d) | [108]     |
|          |             |             |                                                                     |                                                   |                                 |                                                                                                                                                                                                                                                               |           |

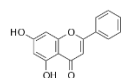

|                                                                                   |             |                                                                        |                                                                |                                         |                         |                                                                                                                                                                            |       |
|-----------------------------------------------------------------------------------|-------------|------------------------------------------------------------------------|----------------------------------------------------------------|-----------------------------------------|-------------------------|----------------------------------------------------------------------------------------------------------------------------------------------------------------------------|-------|
|                                                                                   |             |                                                                        |                                                                |                                         |                         | No improvement in the VCS                                                                                                                                                  |       |
| 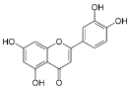 | Gas-CCI     | Tg2576 mice and litter-mate controls (WT)<br><br>Sex is not specified! | IP / 20 mg/kg                                                  | Daily, 15 consecutive days prior to TBI | 3 and 14 days after TBI | ↓ TNF-α and IL-1β protein levels (3d)<br>↓ Aβ40 and Aβ42 protein levels (3d)<br>↓ GSK-3 activation (3d)<br>↓ phospho-tau levels (3d)                                       | [76]  |
|                                                                                   | Weight-drop | CD1 mice                                                               | IP/ 30mg/kg                                                    | Single injection 30 min after the TBI   | 24 h after TBI          | ↓ brain edema<br>↓ IL-1b and TNF-a mRNA and protein levels<br>↓ NF-κB p65 nuclear accumulation<br>↓ neuronal degeneration<br>↑ BBB integrity<br>↑ autophagy                | [106] |
|                                                                                   | Weight-drop | ICR mice                                                               | IP / 10, 30, and 50 mg/kg<br><br>(30mg/kg showed best effects) | Single injection 30 min after the TBI   | 24 h after TBI          | ↓ neurological deficits<br>↓ brain edema<br>Restored MDA levels and GPx activity<br>↑ Nrf2 nuclear content<br>HO1 and NQO1 mRNA and protein levels<br>↓ neuronal apoptosis | [107] |

**Table S5.** Genistein effects on TBI model after intraperitoneal administration. TBI: traumatic brain injury; IP: intraperitoneal injection; BBB: blood-brain barrier; h: hour.

| Isoflavones                                                                         | TBI model   | Species     | Route/concentration | Regimen                         | Time of the brain collection | Main results                                                                          | Reference |
|-------------------------------------------------------------------------------------|-------------|-------------|---------------------|---------------------------------|------------------------------|---------------------------------------------------------------------------------------|-----------|
| 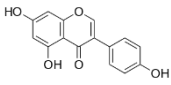 | Weight drop | Wistar rats | IP/ 15 mg/kg        | 30 min and again 24 h after TBI | 48h after TBI                | ↓ brain edema<br>↓ BBB permeability<br>↓ intracranial pressure<br>↑ motor performance | [109]     |

**Table S6.** Curcumin effects on TBI models after oral and intraperitoneal administration. TBI: traumatic brain injury; FPI: fluid percussion injury; CCI: controlled cortical impact; IP: intraperitoneal injection; pAMPK: phosphorylated 5' adenosine monophosphate-activated protein kinase; uMtCK: ubiquitous mitochondrial creatine kinase; COX-II: cytochrome c oxidase II; UCP-2: uncoupling protein 2; BDNF: brain-derived neurotrophic factor; CREB: cAMP-response element binding protein; MDA: malondialdehyde; IL-1β: interleukin 1 beta; IL-6: interleukin 6; TNF-α : tumor necrosis factor alpha; Nrf2: nuclear factor-erythroid factor 2-related factor; HO-1: heme oxygenase 1; NQO1: NAD(P)H:quinone oxidoreductase 1; GCLC: glutamate-cysteine ligase catalytic subunit; GCLM: glutamate-cysteine ligase modifier subunit; Hpp: Hippocampus; IL-18: interleukin 18; p-Trkb: phosphorylated tropomyosin receptor kinase B; PI3K: phosphoinositide 3-kinases; TLR4: Toll-like receptor 4; NF-κB: nuclear factor kappa B; p-IκB-α: phosphorylated nuclear factor of kappa light polypeptide gene enhancer in B-cells inhibitor; GFAP: glial fibrillary acidic protein; AQP4: Aquaporin-4; d: day; h: hour.

| Curcuminoids | TBI model | Species | Route/concentration | Regimen | Time of the brain collection | Main results | Reference |
|--------------|-----------|---------|---------------------|---------|------------------------------|--------------|-----------|
|--------------|-----------|---------|---------------------|---------|------------------------------|--------------|-----------|

|                                                                                                    |             |                                     |                                            |                                                           |                                                   |                                                                                                                                                                                                                                                                                                                                                                    |       |
|----------------------------------------------------------------------------------------------------|-------------|-------------------------------------|--------------------------------------------|-----------------------------------------------------------|---------------------------------------------------|--------------------------------------------------------------------------------------------------------------------------------------------------------------------------------------------------------------------------------------------------------------------------------------------------------------------------------------------------------------------|-------|
| <p>Curcumin</p> 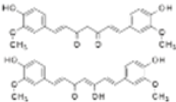 | FPI         | Sprague – Dawley rats               | Rat chow enriched with 500 ppm of curcumin | Four weeks before, and 1 week after TBI                   | 7 days after TBI                                  | <p>↑pAMPK protein levels</p> <p>↑ uMtCK protein levels</p> <p>↑ COX-II protein levels</p> <p>↑ UCP-2 protein levels</p> <p>↑ SIR-2 protein levels</p>                                                                                                                                                                                                              | [77]  |
|                                                                                                    | FPI         | Sprague – Dawley rats               | Rat chow enriched with 500 ppm of curcumin | Four weeks before TBI, and 1 week after TBI               | 7 days after TBI                                  | <p>↑ cognitive performance</p> <p>↓ oxidized protein levels</p> <p>↑ BDNF protein levels</p> <p>↑ synapsin I and p-synapsin I protein levels</p> <p>↑ CREB protein levels</p>                                                                                                                                                                                      | [78]  |
|                                                                                                    | Weight drop | Wistar rats                         | IP / 50 and 100 mg/kg                      | Daily, 5 days before TBI                                  | 14 days after TBI                                 | <p>↓ animal death rate</p> <p>↑ motor and cognitive performance</p> <p>↓ lesion volume</p> <p>↓ MDA levels</p>                                                                                                                                                                                                                                                     | [79]  |
|                                                                                                    | Weight drop | C57BL/6 mice                        | IP / 50 mg/kg                              | Single injection 15 min after TBI                         | 24h after TBI                                     | <p>↓ brain edema</p> <p>↓ ipsilateral cortex injury</p> <p>↓ microglial activation</p> <p>↓ IL-1β, IL-6, TNF-α mRNA levels</p> <p>↑ Nrf2 protein expression and nuclear translocation</p> <p>↑ HO-1, NQO1, GCLM, GCLC mRNA levels</p> <p>↓ neuroapoptosis</p> <p>↓ cleaved caspase-3 protein level</p> <p>↑ Bcl-2 protein level</p>                                | [111] |
|                                                                                                    | CCI         | Sprague/Dawley rats                 | IP / 30 mg/kg                              | Daily, 28 days after TBI                                  | 7, 14, 21, 28 and 40 days after TBI               | <p>↑ spatial memory (40d)</p> <p>↑ neurogenesis in Hpp (35d)</p> <p>↓ IL-1β, IL-6, IL-18, TNF-α protein levels (28d)</p> <p>↓ microglial and astrocytic activation (28d)</p> <p>↑ BDNF, p-Trkb, p-PI3K and p-Akt (7, 14, 21 and 28d)</p>                                                                                                                           | [113] |
|                                                                                                    | Weight drop | C57BL/6 and transgenic TLR4–/– mice | IP / 100 mg/kg                             | Single injection, 15 min after TBI                        | 6, 12, 24, 48 and 72h after TBI                   | <p>↑ neurological score (24h)</p> <p>↓ brain edema (24h)</p> <p>↓ activation of TLR4- positive microglia and astrocytes (24h)</p> <p>↓ IL-1β, IL-6, TNF-α protein levels (24h)</p> <p>↓ TLR4 protein level (24h)</p> <p>↓ MyD88 protein level (24h)</p> <p>↓ NFκB p65 and p-IκB-α protein levels (24h)</p> <p>↓ neurodegeneration and neuronal apoptosis (24h)</p> | [112] |
|                                                                                                    | CCI         | CD-1 mice (8-10 weeks old)          | IP / 75, 150, 300 mg/kg                    | Single injection, either 15 minutes prior to TBI or post- | Multiple time points from 1h to 21 days after TBI | <p>↑ neurological function (1, 3, 7, 14, 21 and 28d)</p> <p>↓ brain edema (24h)</p>                                                                                                                                                                                                                                                                                | [80]  |



|  |                              |                                                                                                                                                                                                  |
|--|------------------------------|--------------------------------------------------------------------------------------------------------------------------------------------------------------------------------------------------|
|  | treated (0.5 or 1h post-TBI) | ↓ IL-1 $\beta$ mRNA expression (1, 6 and 12h)<br>↓ GFAP protein expression (24h)<br>↓ AQP4 protein levels (1 and 2d)<br>↓ reduction of NF- $\kappa$ B p65 protein expression in astrocytes (24h) |
|--|------------------------------|--------------------------------------------------------------------------------------------------------------------------------------------------------------------------------------------------|

**Table S7.** Resveratrol effects on TBI models after oral and intraperitoneal administration. TBI: traumatic brain injury; CCI: controlled cortical impact; IP: intraperitoneal injection; SC: subcutaneous injection; ROS: reactive oxygen species; Nrf2: nuclear factor-erythroid factor 2-related factor; HO-1: heme oxygenase 1; Hpp: Hippocampus; NLRP3: NLR family pyrin domain containing 3; IL-1 $\beta$ : interleukin 1 beta; IL-18: interleukin 18; SOD: superoxide dismutase; GSH: glutathione; MDA: malondialdehyde; NSE: neuron-specific enolase; IL-12: interleukin 12; GPx: glutathione peroxidase; 8-OHdG: 8-hydroxy-2'-deoxyguanosine; TLR4: Toll-like receptor 4; GSH: glutathione; MDA: malondialdehyde; NO: nitric oxide; XO: xanthine oxidase; IHC: immunohistochemistry; NF- $\kappa$ B: nuclear factor kappa B; TNF- $\alpha$ : tumor necrosis factor alpha; SYN: synuclein; PDS-95: postsynaptic density protein-95; d: day; h: hour.

| Stilbenes                                                                                          | TBI model         | Species             | Route/<br>concentration                                          | Regimen                                                                        | Time of the<br>brain collection | Main results                                                                                                                                                                                                                                | Reference |
|----------------------------------------------------------------------------------------------------|-------------------|---------------------|------------------------------------------------------------------|--------------------------------------------------------------------------------|---------------------------------|---------------------------------------------------------------------------------------------------------------------------------------------------------------------------------------------------------------------------------------------|-----------|
| 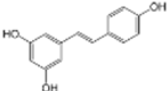<br>Resveratrol | CCI               | Sprague-Dawley rats | Oral gavage/0.05 and 0.1mg/kg<br>(0.1 mg/kg showed best effects) | Daily, for 10 consecutive days, starting 7 days after the TBI                  | not specified                   | ↑ cognitive performance<br>↓ ROS generation<br>↑ Nrf2 protein level<br>↑ HO1 protein level<br>↓ apoptosis<br>↓ cleaved caspase-3 protein level                                                                                              | [119]     |
|                                                                                                    | Concussion injury | Wistar rat          | IP / 100 mg/kg                                                   | Single injection immediately after TBI                                         | 17 days after TBI               | ↑cortex/Hpp dependent memory<br>↓anxiety<br>↓ Hpp neuronal loss                                                                                                                                                                             | [122]     |
|                                                                                                    | Concussion injury | Sprague-Dawley rats | IP / 100 mg/kg                                                   | Single injection, 30 min before TBI                                            | 24 after TBI                    | ↓ brain edema<br>↓ NLRP3 and caspase-1 mRNA and protein levels<br>↓ IL-1 $\beta$ and IL-18 mRNA and protein levels<br>↑ SOD, GSH protein levels<br>↓ MDA protein levels<br>↓ ROS production<br>↑ SIRT1 protein levels<br>↓ NSE serum levels | [81]      |
|                                                                                                    | CCI               | Sprague-Dawley rats | IP / 10 and 100 mg/kg<br>(100 mg/kg showed best effects)         | Injection 5 min after TBI, and two more injections on post-injury days 1 and 2 | 21 days after TBI               | ↑motor performance<br>↑ cognitive performance<br>↓ cortical contusion volume<br>↑neuroprotection in Hpp CA1 and CA3 regions                                                                                                                 | [120]     |

|             |                     |                                                          |                                                      |                              |                                                                                                                                                                                                                                                                                                                                                                                                                                                                                             |       |
|-------------|---------------------|----------------------------------------------------------|------------------------------------------------------|------------------------------|---------------------------------------------------------------------------------------------------------------------------------------------------------------------------------------------------------------------------------------------------------------------------------------------------------------------------------------------------------------------------------------------------------------------------------------------------------------------------------------------|-------|
| CCI         | C57Bl/6 mice        | SC / 100 mg/kg                                           | Injection 5 minutes and 12 hours after TBI           | 72h after TBI                | ↓ microglial activation<br>↓ IL-6 and IL-12 protein levels in Hpp                                                                                                                                                                                                                                                                                                                                                                                                                           | [116] |
| Weight drop | Wistar rats         | IP / 50 and 100 mg/kg<br>(100 mg/kg showed best effects) | Daily, for 7 days after TBI                          | 8 days after TBI             | ↑ neuroprotection in Hpp<br>↑ GPx and 8-OHdG levels                                                                                                                                                                                                                                                                                                                                                                                                                                         | [118] |
| Weight drop | Wistar rats         | IP / 100 mg/kg                                           | Single injection, immediately after TBI              | 24h and 14 days after TBI    | ↓ brain edema (24h)<br>↓ lesion area (14d)<br>↑ GSH protein levels (24h)<br>↓ MDA protein levels (24h)<br>↓ NO and XO protein levels (24h)                                                                                                                                                                                                                                                                                                                                                  | [117] |
| CCI         | Sprague-Dawley rats | IP / 100 mg/kg                                           | Bidaily, for 3 days, beginning immediately after TBI | 12, 24, 48 and 72h after TBI | ↑ spatial cognitive function<br>↑ neurological score (1-5d)<br>↑ learning and memory (3-5d)<br>↓ brain edema (12, 24, 48 and 72h)<br>↑ neuroprotection in Hpp (24h)<br>↓ neuronal autophagy LC3/NeuN IHC (24h)<br>↓ neuronal autophagy (LC3/II, Beclin1) (12,24,48 and 72h)<br>↓ TLR4 neuronal protein levels (TLR4/NeuN) IHC (24h)<br>↓ TLR4 Hpp protein levels (12,24,48 and 72h)<br>↓ NF-kB p65 protein levels (12,24,48 and 72h)<br>↓ IL-1β and TNF-α protein levels (12,24,48 and 72h) | [115] |
| Weight drop | Sprague-Dawley rats | IP / 100 mg/kg                                           | Daily, for 5 days, beginning immediately after TBI   | 1, 3 and 5 days after TBI    | ↑ spatial cognitive function (3-5d)<br>↑ neurological score (1-5d)<br>↓ brain edema (1,3 and 5d)<br>↑ synaptic protein levels (SYN, PSD-95) (1,3 and 5d)<br>↓ neuronal autophagy (LC3, Beclin1) (1,3 and 5d)                                                                                                                                                                                                                                                                                | [114] |

**Table S8.** Phenolic acids effects on TBI models after oral and intraperitoneal administration. TBI: traumatic brain injury; CCI: controlled cortical impact; IP: intraperitoneal injection; IL-1 $\beta$ : interleukin 1 beta; IL-6: interleukin 6; BBB: blood-brain barrier; PS: Population spike amplitude; fEPSP: Field excitatory postsynaptic potential; TNF- $\alpha$  : tumor necrosis factor alpha; MDA: malondialdehyde; HDAC2: histone deacetylase 2; AUC: area under curve; GSH: glutathione; SOD: superoxide dismutase; GPx: glutathione peroxidase; F2-IsoPs: F2-isoprostanes; AQP4: Aquaporin-4; d: day; h: hour.

| Phenolic Acids                                                                                             | TBI model   | Species             | Route/<br>concentration | Regimen                                                      | Time of<br>the brain<br>collection | Main results                                                                                                                                                                                                   | Reference |
|------------------------------------------------------------------------------------------------------------|-------------|---------------------|-------------------------|--------------------------------------------------------------|------------------------------------|----------------------------------------------------------------------------------------------------------------------------------------------------------------------------------------------------------------|-----------|
| Cinnamic acid<br>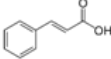         | Weight drop | C57Bl/6 mice        | Oral gavage/ 100 mg/kg  | Daily, 30 consecutive days after TBI                         | 30 days after TBI                  | ↑ neurological function<br>↑ memory<br>↓ brain edema<br>↓ abnormalities in the synapses<br>Restored synaptic spine density<br>Restored synaptophysin protein levels<br>↓ HDAC2 protein levels                  | [126]     |
| Gallic acid<br>         | Weight drop | Wistar rats         | Oral gavage/ 100 mg/kg  | Daily 7 consecutive days before the TBI                      | 8h after TBI                       | ↑ neurological score<br>↑ memory task performance<br>↓ IL-1 $\beta$ , IL-6, TNF- $\alpha$ protein levels<br>↓ MDA levels                                                                                       | [83]      |
|                                                                                                            | Weight drop | Wistar rats         | Oral gavage/ 100 mg/kg  | Daily, from 7 days before to 2 days after TBI                | 48h after TBI                      | Improved electrophysiological parameters (PS and fEPSP)<br>↑ memory task performance<br>↓ IL-1 $\beta$ , IL-6, TNF- $\alpha$ protein levels<br>Improved electrophysiological parameters (PS, PS AUC and fEPSP) | [84]      |
| Protocatechuic acid<br> | CCI         | Sprague-Dawley rats | IP / 30 mg/kg           | Daily for 7 consecutive days, starting immediately after TBI | 24h and 7 days after TBI           | ↓ neurodegeneration (24h)<br>↓ oxidative injury (24h)<br>↓ GSH depletion (24h)<br>↓ dendritic loss (24h)<br>↓ microglial activation (7d)<br>↓ delayed neuronal cell death (7d)                                 | [122]     |
| Ferulic acid<br>        | Weight drop | Wistar rats         | IP / 100 mg/kg          | Single injection immediately after TBI                       | 48h after TBI                      | ↓ neuronal apoptosis<br>↑ SOD, GPx levels<br>↓ MDA levels                                                                                                                                                      | [123]     |

|                                                                                                                   |             |                                      |                 |                                                                                                                                           |                              |                                                                                                                                                                    |       |
|-------------------------------------------------------------------------------------------------------------------|-------------|--------------------------------------|-----------------|-------------------------------------------------------------------------------------------------------------------------------------------|------------------------------|--------------------------------------------------------------------------------------------------------------------------------------------------------------------|-------|
| Caffeic acid phenethyl ester<br>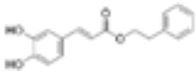 | CCI         | Sprague-Dawley rats and C57BL/6 mice | IP / 10mg/kg    | Single injection, 30 min after TBI for IHC studies or injection 30 min after TBI and daily for 4 consecutive days for behavioural studies | 24h after TBI                | ↓ cortical contusion volume in rats<br>↑ claudin-5 in rats<br>↓ vascular dysfunction in rats and mice<br><br>No improvement of motor or cognitive function in rats | [127] |
|                                                                                                                   | Weight drop | Sprague-Dawley rats                  | IP / 10mg/kg    | 30 min after TBI, and then repeated daily for 7 days                                                                                      |                              | ↓ F2-IsoPs levels in the blood                                                                                                                                     | [124] |
|                                                                                                                   | Weight drop | Sprague-Dawley rats                  | IP / 10mg/kg    | 30 min after TBI, and then repeated daily for 7 days                                                                                      | 24 hand 7 days after the TBI | ↓ AQP4 mRNA expression in the brain (4 and 7d)                                                                                                                     | [128] |
|                                                                                                                   | Weight drop | Sprague-Dawley rats                  | IP / 10 μmol/kg | Single injection 15 min after TBI                                                                                                         | 4h after TBI                 | ↓ MDA levels<br>↑ SOD and GPx levels<br>↓ degenerative changes in neurons<br>↓ caspase-3 immunoreactivity<br><br>Protection of neuronal morphology                 | [125] |

**Table S9.** Ellagic acid effects on TBI models after oral and intraperitoneal administration. TBI: traumatic brain injury; IP: intraperitoneal injection; IL-1β: interleukin 1 beta; IL-6: interleukin 6; BBB: blood-brain barrier; PS: Population spike amplitude; fEPSP: Field excitatory postsynaptic potential; TNF-α : tumor necrosis factor alpha; d: day; h: hour.

| Ellagic acid                                                                                        | Species     | Route/<br>concentration   | Regimen                                 | Time of the<br>brain collection | Main results                                                                                                                                                        | Reference |
|-----------------------------------------------------------------------------------------------------|-------------|---------------------------|-----------------------------------------|---------------------------------|---------------------------------------------------------------------------------------------------------------------------------------------------------------------|-----------|
| Ellagic acid<br>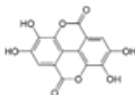 | Wistar rats | Oral gavage/<br>100 mg/kg | Daily 7 consecutive days before the TBI | 48h after TBI                   | ↑ clinical signs<br>↓ learning and memory deficits<br>↓ IL-1β and IL-6 protein levels<br>↑ BBB integrity<br>Restored electrophysiological parameters (PS and fEPSP) | [82]      |
|                                                                                                     | Wistar rats | IP / 100 mg/kg            | Immediately after trauma and then once  | 48h after TBI                   | ↑ neurological score<br>↑ cognitive performance                                                                                                                     | [129]     |

---

every 8hr  
until 48hr

↓ TNF- $\alpha$  protein  
levels

Improved electro-  
physiological pa-  
rameters (PS)

---
